# Supplementary material for: Therapeutic microparticles functionalized with biomimetic cardiac stem cell membranes and secretome
Source: PubMed Central journal article supplement (PMC5512648; doi:10.1038/ncomms13724), 2017-01-03
Supplement: ncomms13724-s1.pdf [file ncomms13724-s1.pdf]

## Supplementary Figure 1

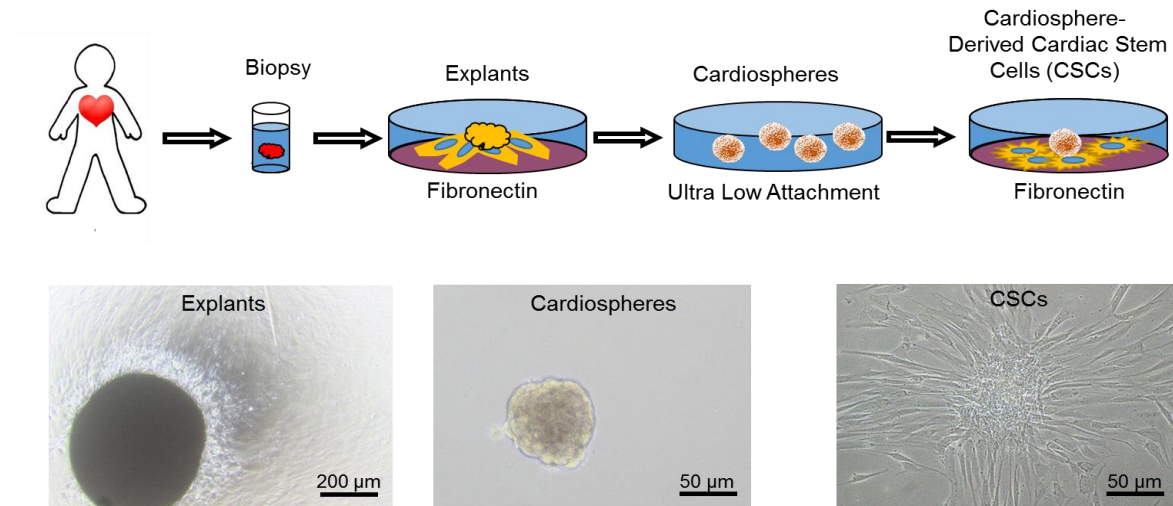

### Supplementary Figure 1: Generation and culture of human cardiac stem cells (CSCs).

Cardiosphere-derived CSCs were generated with three steps: myocardial tissue explants (scale bar, 200  $\mu\text{m}$ ) on fibronectin surface, cardiospheres formed in suspension culture (scale bar, 50  $\mu\text{m}$ ), and cardiosphere-derived cardiac stem cells (CSCs) dissociated from cardiospheres on fibronectin-coated surface (scale bar, 50  $\mu\text{m}$ ).

## Supplementary Figure 2

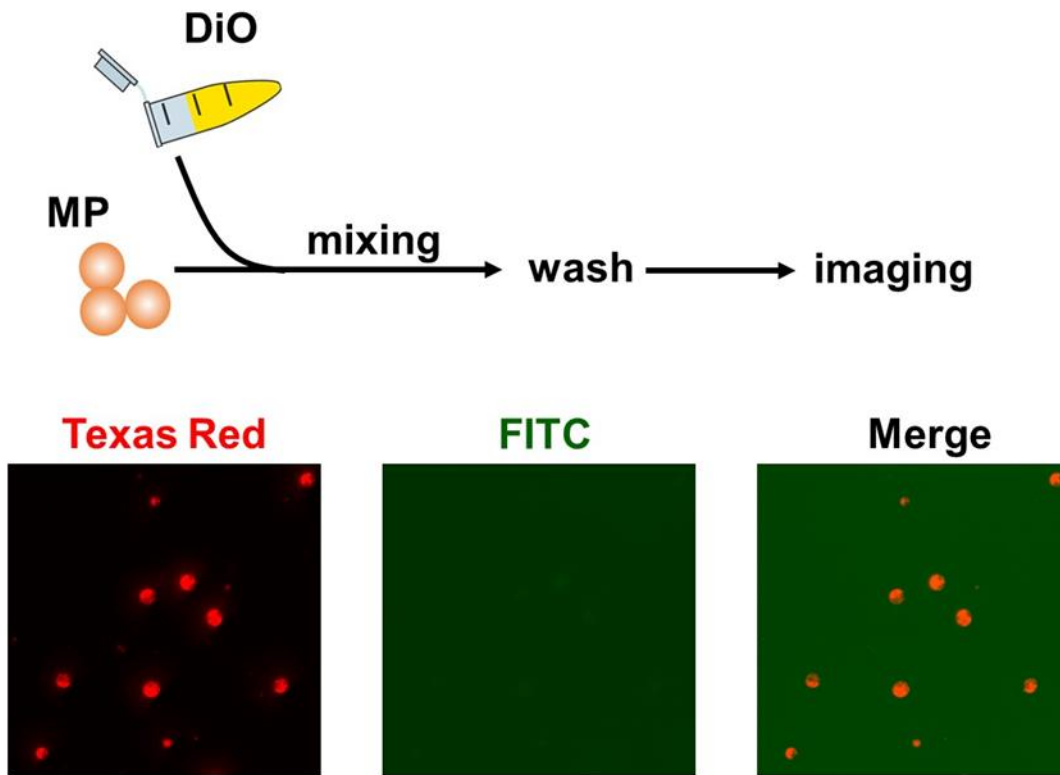

**Supplementary Figure 2: Rule out of nonspecific DiO binding to microparticles.** Schematic showing experimental design. DiO was incubated with Texas red succinimidyl ester-labeled Control-MP<sub>1</sub> for 30 mins following three times wash by PBS.

### Supplementary Figure 3

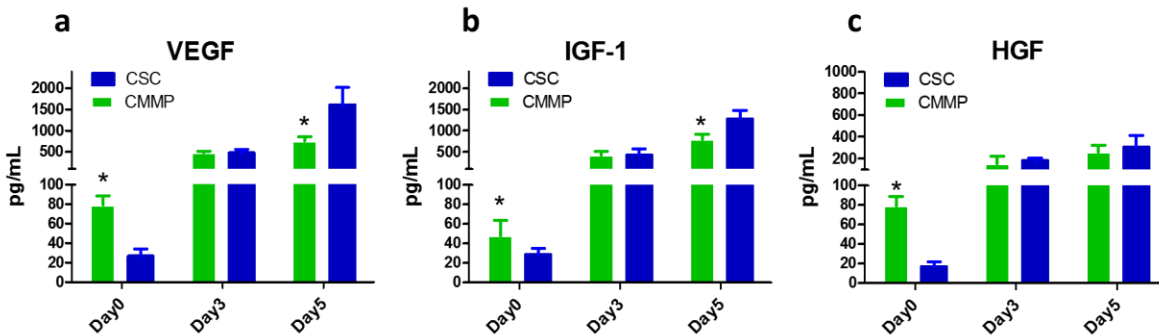

**Supplementary Figure 3: Comparison of regenerative factors released by cell-mimicking microparticles (CMMPs) and cardiac stem cells (CSCs).** Release of vascular endothelial growth factor (VEGF) (a), insulin-like growth factor (IGF)-1 (b) and hepatocyte growth factor (HGF) (c) from CMMPs (green bar) or CSCs (blue bar) at various time points determined by ELISA.  $n = 3$  for each group at each time points. All data are mean  $\pm$  s.d. Comparisons between any two groups were performed using two-tailed unpaired Student's  $t$ -test. \* indicated  $P < 0.05$  when compared to CSC group.

## Supplementary Figure 4

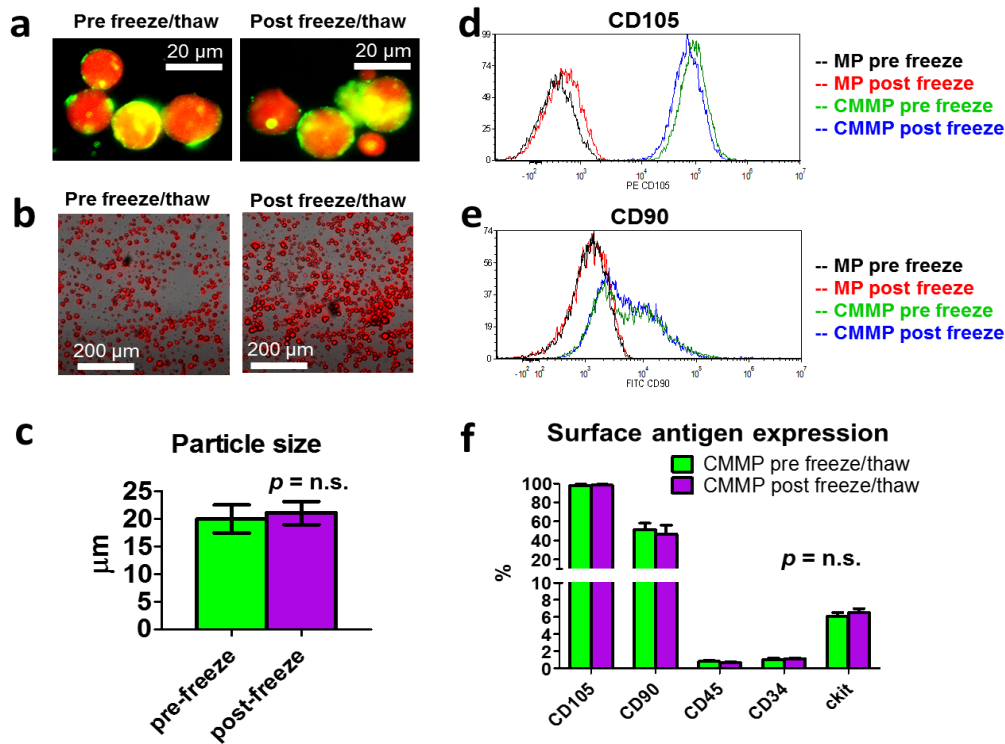

**Supplementary Figure 4: Physiochemical and biological properties of cell-mimicking microparticles (CMMPs) pre- and post-freeze/thaw.** (a) Representative fluorescent images of CMMPs snap frozen at  $-80^{\circ}\text{C}$  and thawed in water. Scale bar,  $20\ \mu\text{m}$ . (b, c) Representative images of CMMPs (b) and quantitation of particle size pre- and post-freeze/thaw. Scale bar,  $200\ \mu\text{m}$ .  $n = 3$  for each group. NS indicated  $P > 0.05$ . (d, e) Freezing and thawing did not alter the expressions of CD105 (d) and CD90 (e) on CMMPs. (f) Surface antigen expressions on CMMPs were not affected by freezing and thawing.  $n = 3$  for each group. NS indicated  $P > 0.05$ . All data are mean  $\pm$  s.d. Comparisons between any two groups were performed using two-tailed unpaired Student's  $t$ -test.

## Supplementary Figure 5

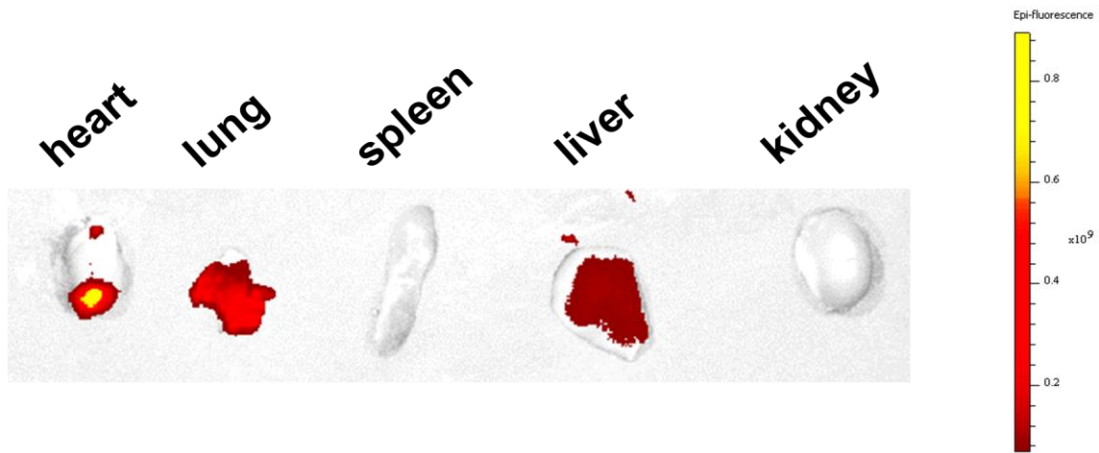

**Supplementary Figure 5: Biodistribution of cell-mimicking microparticles (CMMPs) 7 days after injection.** Representative *ex vivo* fluorescent imaging indicated that the majority of CMMPs remained in the heart after injection, while “washed away” CMMP signal could be found in the lung and the liver.

## Supplementary Figure 6

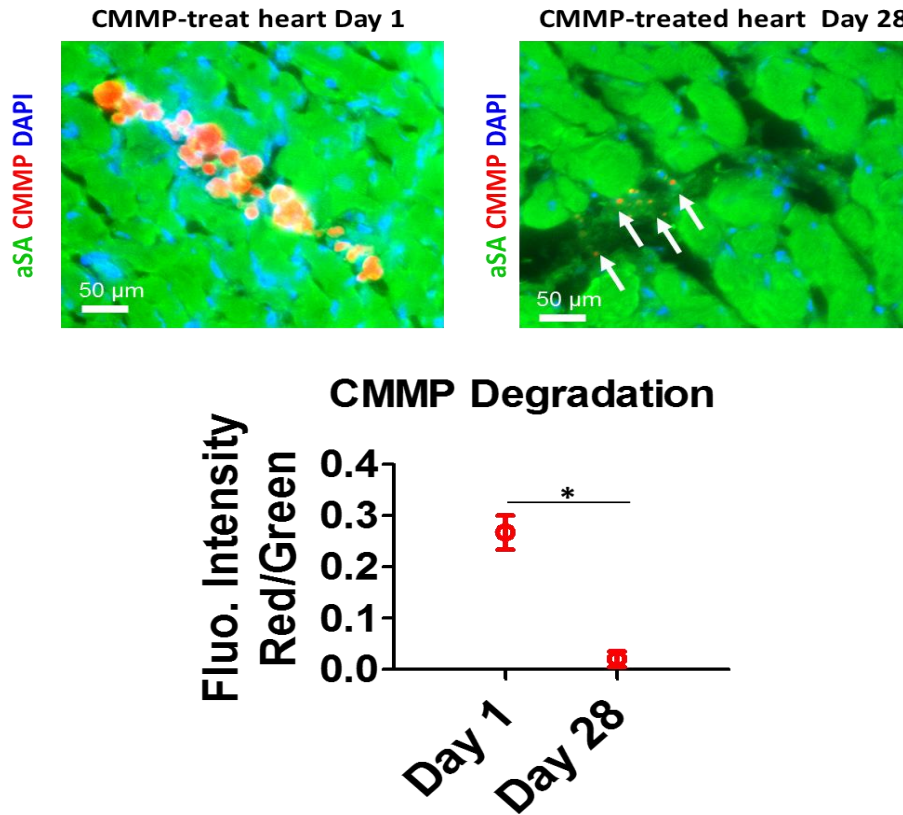

### Supplementary Figure 6: Degradation of cell-mimicking microparticles (CMMPs) *in vivo*.

Representative microscopic images showing injected CMMPs (red) in post MI hearts at Day 1 and Day 28. White arrow indicated the trace amount of CMMPs at Day 28. Scale bar, 50 µm.

Quantitation of CMMPs degradation as reflected by the decrease of red fluorescence. n = 3 animals per group. \* indicated  $P < 0.05$  when compared to “Day 1” values. All data are mean  $\pm$  s.d.

Comparisons between any two groups were performed using two-tailed unpaired Student’s *t*-test.

## Supplementary Table 1

| Characteristics                                        | Cardiac Stem Cells                          | Cell-mimicking microparticles (CMMPs) |
|--------------------------------------------------------|---------------------------------------------|---------------------------------------|
| Secretion of regenerative factors                      | Yes                                         | Yes                                   |
| Binding to host cells                                  | Yes                                         | Yes                                   |
| Ability to differentiate into host cells               | Yes (but very rare)                         | No                                    |
| Ability to proliferate                                 | Yes (limited proliferation <i>in vivo</i> ) | No                                    |
| Ability to leave blood vessels after delivery          | Yes                                         | Yes                                   |
| Therapeutic benefits in myocardial infarction          | Yes                                         | Yes                                   |
| Cryopreservation and storage without affecting quality | No                                          | Yes                                   |
| Stimulate local T cell immune response                 | Yes                                         | No                                    |

**Supplementary Table 1: Summarized comparison between cardiac stem cells and CMMPs.**
